# Supplementary material for: Pyrite-lined shells as indicators of inefficient bioirrigation in the Holocene–Anthropocene stratigraphic record
Source: Copernicus journal article supplement (doi:10.5194/bg-18-5929-2021), 2021-11-22
Supplement: Supplementary file 1 [file bg-18-5929-2021-supplement.zip]

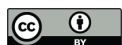

*Supplement of*

## **Pyrite-lined shells as indicators of inefficient bioirrigation in the Holocene–Anthropocene stratigraphic record**

**Adam Tomašových et al.**

*Correspondence to:* Adam Tomašových (geoltoma@savba.sk)

- bg-18-5929-2021-supplement-title-page.pdf
- Table S2-Taphonomic scores of Varicorbula-pyrite linings.txt
- Tomasovych et al. 2021 BG script.txt

The copyright of individual parts of the supplement might differ from the article licence.
